# Supplementary material
Source: PubMed Central journal article supplement (PMC10292656)
Supplement: NIHMS1892705-supplement-Online_Supplement.pdf [file NIHMS1892705-supplement-Online_Supplement.pdf]

## **Demographic and Geographic Variation in Fatal Drug Overdose Rates in the United States, 1999-2020**

Shannon M. Monnat  
Lerner Chair in Public Health Promotion and Population Health  
Director, Center for Policy Research  
Professor of Sociology  
Maxwell School of Citizenship and Public Affairs  
Syracuse University  
[smmonnat@syr.edu](mailto:smmonnat@syr.edu)

### **ONLINE APPENDIX**

Table A1. Fatal Drug Poisoning Rates and Annual Rates of Change for Males ages 15-24, by Race/Ethnicity, 1999-2020  
Table A2. Fatal Drug Poisoning Rates and Annual Rates of Change for Females ages 15-24, by Race/Ethnicity, 1999-2020  
Table A3. Fatal Drug Poisoning Rates and Annual Rates of Change for Males ages 25-34, by Race/Ethnicity, 1999-2020  
Table A4. Fatal Drug Poisoning Rates and Annual Rates of Change for Females ages 25-34, by Race/Ethnicity, 1999-2020  
Table A5. Fatal Drug Poisoning Rates and Annual Rates of Change for Males ages 35-44, by Race/Ethnicity, 1999-2020  
Table A6. Fatal Drug Poisoning Rates and Annual Rates of Change for Females ages 35-44, by Race/Ethnicity, 1999-2020  
Table A7. Fatal Drug Poisoning Rates and Annual Rates of Change for Males ages 45-54, by Race/Ethnicity, 1999-2020  
Table A8. Fatal Drug Poisoning Rates and Annual Rates of Change for Females ages 45-54, by Race/Ethnicity, 1999-2020  
Table A9. Fatal Drug Poisoning Rates and Annual Rates of Change for Males ages 55-64, by Race/Ethnicity, 1999-2020  
Table A10. Fatal Drug Poisoning Rates and Annual Rates of Change for Females ages 55-64, by Race/Ethnicity, 1999-2020  
Table A11. Fatal Drug Poisoning Rates and Annual Rates of Change for Males ages 65+, by Race/Ethnicity, 1999-2020  
Table A12. Fatal Drug Poisoning Rates and Annual Rates of Change for Females ages 65+, by Race/Ethnicity, 1999-2020  
Table A13. Demographic Ranking of Overall Fatal Drug Poisoning Rates (deaths per 100,000 population), 1999-2020  
Figure A1. Fatal Drug Poisoning Rates by Drug Type for Males by Race/Ethnicity, 1999-2020  
Figure A2. Fatal Drug Poisoning Rates by Drug Type for Females by Race/Ethnicity, 1999-2020  
Figure A3. Fatal Drug Poisonings by Drug Type by Age Group, 1999-2020  
Table B1. Fatal Drug Poisoning Rates (age-adjusted) and Annual Rates of Change by Region, 1999-2020  
Figure B1. Fatal Drug Poisonings by Drug Type by Census Region, 1999-2020  
Table B2. Fatal Drug Poisoning Rates (age-adjusted) and Annual Rates of Change by Urban-Rural Continuum, 1999-2020  
Figure B2. Fatal Drug Poisonings by Drug Type by Metro Status, 1999-2020

**Table A1. Fatal Drug Poisoning Rates and Annual Rates of Change for Males ages 15-24, by Race/Ethnicity, 1999-2020**

| Fatal Drug Poisoning Rate (Deaths per 100,000 population) |          |          |          |         |          | Annual Percentage Change |          |          |         |          |
|-----------------------------------------------------------|----------|----------|----------|---------|----------|--------------------------|----------|----------|---------|----------|
| Year                                                      | NH White | NH Black | Hispanic | NH AIAN | NH Asian | NH White                 | NH Black | Hispanic | NH AIAN | NH Asian |
| 1999                                                      | 5.4      | 2.8      | 3.5      | *       | *        | ---                      | ---      | ---      | ---     | ---      |
| 2000                                                      | 7.0      | 2.2      | 2.9      | *       | 1.3      | 29.63                    | -21.43   | -17.14   | *       | *        |
| 2001                                                      | 8.1      | 2.6      | 2.9      | *       | 1.7      | 15.71                    | 18.18    | 0.00     | *       | 27.19    |
| 2002                                                      | 9.7      | 2.8      | 4.1      | 7.5     | 1.3      | 19.75                    | 7.69     | 41.38    | *       | -21.37   |
| 2003                                                      | 12.1     | 2.3      | 4.6      | 6.9     | 1.3      | 24.74                    | -17.86   | 12.20    | -8.01   | -2.95    |
| 2004                                                      | 13.5     | 3.0      | 4.0      | 10.4    | 1.3      | 11.57                    | 30.43    | -13.04   | 50.94   | -2.74    |
| 2005                                                      | 14.0     | 2.8      | 4.9      | 9.3     | 1.8      | 3.70                     | -6.67    | 22.50    | -10.58  | 42.52    |
| 2006                                                      | 17.4     | 3.2      | 4.3      | 11.0    | 2.0      | 24.29                    | 14.29    | -12.24   | 18.28   | 10.72    |
| 2007                                                      | 17.2     | 3.3      | 5.3      | 14.0    | 2.1      | -1.15                    | 3.12     | 23.26    | 27.27   | 5.00     |
| 2008                                                      | 17.3     | 2.6      | 5.1      | 16.3    | 1.3      | 0.58                     | -21.21   | -3.77    | 16.43   | -36.76   |
| 2009                                                      | 16.4     | 2.3      | 5.0      | 16.1    | 3.0      | -5.20                    | -11.54   | -1.96    | -1.23   | 125.90   |
| 2010                                                      | 17.0     | 3.0      | 5.1      | 12.2    | 1.9      | 3.66                     | 30.43    | 2.00     | -24.22  | -36.67   |
| 2011                                                      | 17.9     | 3.4      | 5.8      | 12.1    | 3.9      | 5.29                     | 13.33    | 13.73    | -0.82   | 105.26   |
| 2012                                                      | 16.6     | 3.4      | 4.9      | 15.1    | 3.5      | -7.26                    | 0.00     | -15.52   | 24.79   | -10.26   |
| 2013                                                      | 16.7     | 3.7      | 6.0      | 12.9    | 3.8      | 0.60                     | 8.82     | 22.45    | -14.57  | 8.57     |
| 2014                                                      | 17.4     | 4.0      | 6.0      | 14.2    | 3.1      | 4.19                     | 8.11     | 0.00     | 10.08   | -18.42   |
| 2015                                                      | 18.5     | 5.3      | 7.8      | 13.4    | 3.5      | 6.32                     | 32.50    | 30.00    | -5.63   | 12.90    |
| 2016                                                      | 24.3     | 8.3      | 9.3      | 18.1    | 6.0      | 31.35                    | 56.60    | 19.23    | 35.07   | 71.43    |
| 2017                                                      | 23.8     | 8.4      | 9.4      | 19.0    | 5.4      | -2.06                    | 1.20     | 1.08     | 4.97    | -10.00   |
| 2018                                                      | 19.0     | 7.9      | 9.6      | 19.3    | 4.9      | -20.17                   | -5.95    | 2.13     | 1.58    | -9.26    |
| 2019                                                      | 17.9     | 10.8     | 13.6     | 27.6    | 6.4      | -5.79                    | 36.71    | 41.67    | 43.01   | 30.61    |
| 2020                                                      | 25.5     | 21.6     | 23.4     | 31.6    | 9.4      | 42.46                    | 100.00   | 72.06    | 14.49   | 46.88    |
| Overall                                                   | 15.9     | 5.0      | 7.0      | 13.6    | 3.4      |                          |          |          |         |          |
| Average Annual Percentage Change                          |          |          |          |         |          | 8.68                     | 13.18    | 11.43    | 10.10   | 16.93    |
| Overall Increase 1999-2020 (Percent)                      |          |          |          |         |          | 372.22                   | 671.43   | 568.57   | 321.89  | 600.13   |

*Data Source:* CDC WONDER, Multiple Cause of Death Files; Includes deaths with an underlying cause ICD-10 code of X40-X44, X60-X64, X85, Y10-Y14.

*Note:* Shaded cells indicate the group with the highest fatal drug poisoning rate and highest annual rate of growth in that year.

\*To conform with CDC suppression rules, rates are not shown for groups in years when there were fewer than 10 deaths in that group. In those cases, the base year for calculating the overall increase is based on the earliest year for which a rate is shown.

**Table A2. Fatal Drug Poisoning Rates and Annual Rates of Change for Females ages 15-24, by Race/Ethnicity, 1999-2020**

| Year                                 | Fatal Drug Poisoning Rate (Deaths per 100,000 population) |            |            |            |            | Annual Percentage Change |          |          |         |          |
|--------------------------------------|-----------------------------------------------------------|------------|------------|------------|------------|--------------------------|----------|----------|---------|----------|
|                                      | NH White                                                  | NH Black   | Hispanic   | NH AIAN    | NH Asian   | NH White                 | NH Black | Hispanic | NH AIAN | NH Asian |
| 1999                                 | 2.3                                                       | 0.9        | 1.0        | *          | 1.5        | ---                      | ---      | ---      | ---     | ---      |
| 2000                                 | 2.4                                                       | 1.2        | 0.7        | *          | *          | 4.35                     | 33.33    | -30.00   | *       | *        |
| 2001                                 | 2.8                                                       | 0.9        | 1.2        | *          | 1.1        | 16.67                    | -25.00   | 71.43    | *       | *        |
| 2002                                 | 3.8                                                       | 1.0        | 1.3        | *          | *          | 35.71                    | 11.11    | 8.33     | *       | *        |
| 2003                                 | 4.2                                                       | 1.1        | 1.4        | *          | 1.2        | 10.53                    | 10.00    | 7.69     | *       | *        |
| 2004                                 | 4.5                                                       | 1.2        | 1.6        | *          | 1.0        | 7.14                     | 9.09     | 14.29    | *       | *        |
| 2005                                 | 4.7                                                       | 1.3        | 1.7        | 6.0        | 1.2        | 4.44                     | 8.33     | 6.25     | *       | *        |
| 2006                                 | 5.4                                                       | 1.6        | 1.8        | *          | *          | 14.89                    | 23.08    | 5.88     | *       | *        |
| 2007                                 | 5.8                                                       | 1.5        | 1.8        | 6.8        | 1.9        | 7.41                     | -6.25    | 0.00     | *       | *        |
| 2008                                 | 5.6                                                       | 1.4        | 1.7        | 5.5        | 1.6        | -3.45                    | -6.67    | -5.56    | -19.58  | -12.17   |
| 2009                                 | 5.7                                                       | 1.5        | 1.6        | 7.8        | 1.2        | 1.79                     | 7.14     | -5.88    | 42.95   | -29.53   |
| 2010                                 | 6.7                                                       | 1.7        | 1.6        | 7.0        | 1.6        | 17.54                    | 13.33    | 0.00     | -10.72  | 35.72    |
| 2011                                 | 6.7                                                       | 1.5        | 2.1        | 6.9        | 0.9        | 0.00                     | -11.76   | 31.25    | -0.52   | -44.55   |
| 2012                                 | 6.3                                                       | 1.7        | 1.8        | 5.5        | 1.3        | -5.97                    | 13.33    | -14.29   | -20.38  | 45.47    |
| 2013                                 | 6.9                                                       | 1.7        | 2.1        | 6.4        | 1.3        | 9.52                     | 0.00     | 16.67    | 16.27   | -1.35    |
| 2014                                 | 7.0                                                       | 2.3        | 2.5        | 7.8        | 1.1        | 1.45                     | 35.29    | 19.05    | 21.66   | -9.81    |
| 2015                                 | 8.2                                                       | 2.8        | 2.9        | 6.0        | 2.3        | 17.14                    | 21.74    | 16.00    | -22.96  | 103.26   |
| 2016                                 | 9.6                                                       | 4.2        | 3.6        | 8.9        | 2.1        | 17.07                    | 50.00    | 24.14    | 47.98   | -8.70    |
| 2017                                 | 10.9                                                      | 5.1        | 3.7        | 11.9       | 2.0        | 13.54                    | 21.43    | 2.78     | 33.71   | -4.76    |
| 2018                                 | 10.0                                                      | 4.2        | 3.2        | 8.7        | 2.0        | -8.26                    | -17.65   | -13.51   | -26.93  | 0.00     |
| 2019                                 | 9.1                                                       | 5.5        | 4.1        | 12.2       | 2.0        | -9.00                    | 30.95    | 28.13    | 40.17   | 0.00     |
| 2020                                 | 11.6                                                      | 9.0        | 6.3        | 18.1       | 3.8        | 27.47                    | 63.64    | 53.66    | 48.36   | 90.00    |
| <i>Overall</i>                       | <i>6.3</i>                                                | <i>2.5</i> | <i>2.4</i> | <i>6.7</i> | <i>1.6</i> |                          |          |          |         |          |
| Average Annual Percentage Change     |                                                           |            |            |            |            | 8.57                     | 13.55    | 11.25    | 11.54   | 12.58    |
| Overall Increase 1999-2020 (Percent) |                                                           |            |            |            |            | 404.35                   | 900.00   | 530.00   | 202.79  | 148.20   |

*Data Source:* CDC WONDER, Multiple Cause of Death Files; Includes deaths with an underlying cause ICD-10 code of X40-X44, X60-X64, X85, Y10-Y14.

*Note:* Shaded cells indicate the group with the highest fatal drug poisoning rate and highest annual rate of growth in that year.

\*To conform with CDC suppression rules, rates are not shown for groups in years when there were fewer than 10 deaths in that group. In those cases, the base year for calculating the overall increase is based on the earliest year for which a rate is shown.

**Table A3. Fatal Drug Poisoning Rates and Annual Rates of Change for Males ages 25-34, by Race/Ethnicity, 1999-2020**

| Fatal Drug Poisoning Rate (Deaths per 100,000 population) |             |             |             |             |            | Annual Percentage Change |          |          |         |          |
|-----------------------------------------------------------|-------------|-------------|-------------|-------------|------------|--------------------------|----------|----------|---------|----------|
| Year                                                      | NH White    | NH Black    | Hispanic    | NH AIAN     | NH Asian   | NH White                 | NH Black | Hispanic | NH AIAN | NH Asian |
| 1999                                                      | 12.1        | 12.2        | 11.0        | 12.1        | 1.8        | ---                      | ---      | ---      | ---     | ---      |
| 2000                                                      | 12.6        | 10.6        | 9.2         | 13.6        | 1.3        | 4.13                     | -13.11   | -16.36   | 12.40   | -26.04   |
| 2001                                                      | 14.4        | 9.6         | 8.1         | 10.9        | 1.9        | 14.29                    | -9.43    | -11.96   | -19.56  | 40.98    |
| 2002                                                      | 18.1        | 11.3        | 8.8         | 17.7        | 2.5        | 25.69                    | 17.71    | 8.64     | 61.79   | 31.58    |
| 2003                                                      | 19.8        | 10.1        | 9.6         | 20.3        | 3.1        | 9.39                     | -10.62   | 9.09     | 14.69   | 24.00    |
| 2004                                                      | 21.7        | 10.1        | 8.6         | 22.8        | 1.9        | 9.60                     | 0.00     | -10.42   | 12.32   | -38.71   |
| 2005                                                      | 24.3        | 12.8        | 10.1        | 27.7        | 2.6        | 11.98                    | 26.73    | 17.44    | 21.49   | 36.84    |
| 2006                                                      | 30.1        | 15.6        | 11.1        | 33.1        | 2.4        | 23.87                    | 21.88    | 9.90     | 19.49   | -7.69    |
| 2007                                                      | 32.6        | 11.8        | 10.4        | 24.8        | 2.7        | 8.31                     | -24.36   | -6.31    | -25.08  | 12.50    |
| 2008                                                      | 32.9        | 9.9         | 10.9        | 35.0        | 3.2        | 0.92                     | -16.10   | 4.81     | 41.13   | 18.52    |
| 2009                                                      | 33.9        | 10.3        | 10.2        | 28.5        | 3.1        | 3.04                     | 4.04     | -6.42    | -18.57  | -3.13    |
| 2010                                                      | 35.3        | 11.0        | 10.0        | 28.1        | 4.1        | 4.13                     | 6.80     | -1.96    | -1.40   | 32.26    |
| 2011                                                      | 39.2        | 11.2        | 11.4        | 30.3        | 5.0        | 11.05                    | 1.82     | 14.00    | 7.83    | 21.95    |
| 2012                                                      | 38.3        | 11.9        | 10.9        | 37.5        | 5.5        | -2.30                    | 6.25     | -4.39    | 23.76   | 10.00    |
| 2013                                                      | 40.3        | 13.5        | 12.6        | 31.8        | 5.6        | 5.22                     | 13.45    | 15.60    | -15.20  | 1.82     |
| 2014                                                      | 45.2        | 15.0        | 13.6        | 46.3        | 5.6        | 12.16                    | 11.11    | 7.94     | 45.60   | 0.00     |
| 2015                                                      | 53.5        | 18.1        | 16.3        | 48.7        | 8.3        | 18.36                    | 20.67    | 19.85    | 5.18    | 48.21    |
| 2016                                                      | 68.3        | 27.2        | 22.8        | 54.2        | 8.0        | 27.66                    | 50.28    | 39.88    | 11.29   | -3.61    |
| 2017                                                      | 75.5        | 33.6        | 25.3        | 56.6        | 10.9       | 10.54                    | 23.53    | 10.96    | 4.43    | 36.25    |
| 2018                                                      | 67.4        | 33.7        | 26.5        | 51.2        | 9.4        | -10.73                   | 0.30     | 4.74     | -9.54   | -13.76   |
| 2019                                                      | 65.0        | 35.9        | 31.6        | 62.4        | 10.7       | -3.56                    | 6.53     | 19.25    | 21.88   | 13.83    |
| 2020                                                      | 82.2        | 60.9        | 46.7        | 96.0        | 14.3       | 26.46                    | 69.64    | 47.78    | 53.85   | 33.64    |
| <i>Overall</i>                                            | <i>39.6</i> | <i>19.4</i> | <i>16.0</i> | <i>37.7</i> | <i>5.7</i> |                          |          |          |         |          |
| Average Annual Percentage Change                          |             |             |             |             |            | 10.01                    | 9.86     | 8.19     | 12.75   | 12.83    |
| Overall Increase 1999-2020 (Percent)                      |             |             |             |             |            | 579.34                   | 399.18   | 324.55   | 693.39  | 684.78   |

*Data Source:* CDC WONDER, Multiple Cause of Death Files; Includes deaths with an underlying cause ICD-10 code of X40-X44, X60-X64, X85, Y10-Y14.

*Note:* Shaded cells indicate the group with the highest fatal drug poisoning rate and highest annual rate of growth in that year.

**Table A4. Fatal Drug Poisoning Rates and Annual Rates of Change for Females ages 25-34, by Race/Ethnicity, 1999-2020**

| Fatal Drug Poisoning Rate (Deaths per 100,000 population) |          |          |          |         |          | Annual Percentage Change |          |          |         |          |
|-----------------------------------------------------------|----------|----------|----------|---------|----------|--------------------------|----------|----------|---------|----------|
| Year                                                      | NH White | NH Black | Hispanic | NH AIAN | NH Asian | NH White                 | NH Black | Hispanic | NH AIAN | NH Asian |
| 1999                                                      | 5.3      | 4.6      | 2.5      | 6.6     | 1.0      | ---                      | ---      | ---      | ---     | ---      |
| 2000                                                      | 5.5      | 4.0      | 2.1      | 4.7     | 0.9      | 3.77                     | -13.04   | -16.00   | -28.19  | -2.45    |
| 2001                                                      | 6.4      | 4.3      | 2.5      | 12.1    | 1.0      | 16.36                    | 7.50     | 19.05    | 156.19  | 3.85     |
| 2002                                                      | 8.0      | 4.7      | 2.3      | 9.7     | 1.4      | 25.00                    | 9.30     | -8.00    | -19.50  | 47.80    |
| 2003                                                      | 9.2      | 4.9      | 2.9      | 13.4    | 1.4      | 15.00                    | 4.26     | 26.09    | 37.57   | -3.33    |
| 2004                                                      | 9.6      | 4.9      | 2.6      | 17.1    | 1.2      | 4.35                     | 0.00     | -10.34   | 27.61   | -14.40   |
| 2005                                                      | 11.3     | 6.1      | 2.8      | 17.0    | 1.7      | 17.71                    | 24.49    | 7.69     | -0.58   | 44.31    |
| 2006                                                      | 13.3     | 4.8      | 3.5      | 10.3    | 1.7      | 17.70                    | -21.31   | 25.00    | -39.52  | 0.00     |
| 2007                                                      | 14.4     | 5.3      | 3.1      | 14.3    | 1.6      | 8.27                     | 10.42    | -11.43   | 39.08   | -5.88    |
| 2008                                                      | 14.0     | 4.6      | 3.4      | 17.5    | 2.2      | -2.78                    | -13.21   | 9.68     | 22.38   | 37.50    |
| 2009                                                      | 14.7     | 4.9      | 3.8      | 21.1    | 1.6      | 5.00                     | 6.52     | 11.76    | 20.57   | -27.27   |
| 2010                                                      | 16.9     | 5.6      | 4.3      | 25.8    | 1.3      | 14.97                    | 14.29    | 13.16    | 22.27   | -16.75   |
| 2011                                                      | 18.1     | 6.7      | 4.5      | 20.4    | 2.2      | 7.10                     | 19.64    | 4.65     | -20.93  | 65.16    |
| 2012                                                      | 18.7     | 6.0      | 4.8      | 28.2    | 1.5      | 3.31                     | -10.45   | 6.67     | 38.24   | -31.82   |
| 2013                                                      | 18.3     | 6.5      | 4.9      | 24.0    | 2.1      | -2.14                    | 8.33     | 2.08     | -14.89  | 40.00    |
| 2014                                                      | 20.0     | 7.1      | 5.4      | 25.1    | 2.2      | 9.29                     | 9.23     | 10.20    | 4.58    | 4.76     |
| 2015                                                      | 22.8     | 7.8      | 5.5      | 22.6    | 2.1      | 14.00                    | 9.86     | 1.85     | -9.96   | -4.55    |
| 2016                                                      | 28.5     | 11.4     | 7.0      | 32.1    | 2.9      | 25.00                    | 46.15    | 27.27    | 42.04   | 38.10    |
| 2017                                                      | 31.5     | 13.8     | 8.3      | 30.3    | 2.2      | 10.53                    | 21.05    | 18.57    | -5.61   | -24.14   |
| 2018                                                      | 29.3     | 13.7     | 8.7      | 26.0    | 3.3      | -6.98                    | -0.72    | 4.82     | -14.19  | 50.00    |
| 2019                                                      | 29.0     | 16.7     | 8.7      | 38.5    | 2.8      | -1.02                    | 21.90    | 0.00     | 48.08   | -15.15   |
| 2020                                                      | 35.3     | 27.3     | 12.2     | 59.7    | 3.5      | 21.72                    | 63.47    | 40.23    | 55.06   | 25.00    |
| Overall                                                   | 17.4     | 8.4      | 5.1      | 22.6    | 2.0      |                          |          |          |         |          |
| Average Annual Percentage Change                          |          |          |          |         |          | 9.82                     | 10.37    | 8.71     | 17.16   | 10.04    |
| Overall Increase 1999-2020 (Percent)                      |          |          |          |         |          | 566.04                   | 493.48   | 388.00   | 807.70  | 268.15   |

*Data Source:* CDC WONDER, Multiple Cause of Death Files; Includes deaths with an underlying cause ICD-10 code of X40-X44, X60-X64, X85, Y10-Y14.

*Note:* Shaded cells indicate the group with the highest fatal drug poisoning rate and highest annual rate of growth in that year.

**Table A5. Fatal Drug Poisoning Rates and Annual Rates of Change for Males ages 35-44, by Race/Ethnicity, 1999-2020**

| Year                                 | Fatal Drug Poisoning Rate (Deaths per 100,000 population) |             |             |             |            | Annual Percentage Change |          |          |         |          |
|--------------------------------------|-----------------------------------------------------------|-------------|-------------|-------------|------------|--------------------------|----------|----------|---------|----------|
|                                      | NH White                                                  | NH Black    | Hispanic    | NH AIAN     | NH Asian   | NH White                 | NH Black | Hispanic | NH AIAN | NH Asian |
| 1999                                 | 18.9                                                      | 24.4        | 20.7        | 14.9        | 2.7        | ---                      | ---      | ---      | ---     | ---      |
| 2000                                 | 20.1                                                      | 23.6        | 16.7        | 12.2        | 3.4        | 6.35                     | -3.28    | -19.32   | -18.12  | 25.93    |
| 2001                                 | 22.0                                                      | 23.1        | 15.3        | 14.5        | 3.1        | 9.45                     | -2.12    | -8.38    | 18.85   | -8.82    |
| 2002                                 | 25.6                                                      | 23.9        | 17.5        | 19.8        | 3.1        | 16.36                    | 3.46     | 14.38    | 36.55   | 0.00     |
| 2003                                 | 27.0                                                      | 23.7        | 17.0        | 30.3        | 2.0        | 5.47                     | -0.84    | -2.86    | 53.03   | -35.48   |
| 2004                                 | 27.5                                                      | 20.7        | 15.0        | 32.9        | 3.1        | 1.85                     | -12.66   | -11.76   | 8.58    | 55.00    |
| 2005                                 | 28.1                                                      | 21.9        | 16.0        | 27.4        | 3.6        | 2.18                     | 5.80     | 6.67     | -16.72  | 16.13    |
| 2006                                 | 31.4                                                      | 28.3        | 17.5        | 28.7        | 3.7        | 11.74                    | 29.22    | 9.38     | 4.74    | 2.78     |
| 2007                                 | 32.3                                                      | 21.5        | 15.6        | 27.9        | 3.7        | 2.87                     | -24.03   | -10.86   | -2.79   | 0.00     |
| 2008                                 | 31.6                                                      | 18.8        | 14.6        | 35.5        | 3.2        | -2.17                    | -12.56   | -6.41    | 27.24   | -13.51   |
| 2009                                 | 31.5                                                      | 17.1        | 13.3        | 54.5        | 3.8        | -0.32                    | -9.04    | -8.90    | 53.52   | 18.75    |
| 2010                                 | 32.3                                                      | 13.9        | 12.8        | 38.9        | 3.0        | 2.54                     | -18.71   | -3.76    | -28.62  | -21.05   |
| 2011                                 | 34.9                                                      | 17.1        | 12.7        | 44.5        | 3.9        | 8.05                     | 23.02    | -0.78    | 14.40   | 30.00    |
| 2012                                 | 35.6                                                      | 16.2        | 13.9        | 33.8        | 5.3        | 2.01                     | -5.26    | 9.45     | -24.04  | 35.90    |
| 2013                                 | 36.9                                                      | 19.0        | 13.8        | 37.0        | 5.1        | 3.65                     | 17.28    | -0.72    | 9.47    | -3.77    |
| 2014                                 | 40.8                                                      | 19.8        | 15.6        | 50.7        | 4.2        | 10.57                    | 4.21     | 13.04    | 37.03   | -17.65   |
| 2015                                 | 47.9                                                      | 27.1        | 17.9        | 50.5        | 5.3        | 17.40                    | 36.87    | 14.74    | -0.39   | 26.19    |
| 2016                                 | 61.7                                                      | 36.5        | 24.3        | 48.0        | 6.7        | 28.81                    | 34.69    | 35.75    | -4.95   | 26.42    |
| 2017                                 | 68.6                                                      | 47.1        | 27.4        | 66.2        | 8.7        | 11.18                    | 29.04    | 12.76    | 37.92   | 29.85    |
| 2018                                 | 67.3                                                      | 48.0        | 27.9        | 72.6        | 8.8        | -1.90                    | 1.91     | 1.82     | 9.67    | 1.15     |
| 2019                                 | 70.1                                                      | 58.0        | 33.8        | 74.0        | 10.3       | 4.16                     | 20.83    | 21.15    | 1.93    | 17.05    |
| 2020                                 | 92.0                                                      | 85.6        | 45.4        | 101.4       | 13.6       | 31.24                    | 47.59    | 34.32    | 37.03   | 32.04    |
| <i>Overall</i>                       | <i>38.6</i>                                               | <i>29.1</i> | <i>20.0</i> | <i>41.2</i> | <i>5.4</i> |                          |          |          |         |          |
| Average Annual Percentage Change     |                                                           |             |             |             |            | 8.17                     | 7.88     | 4.75     | 12.11   | 10.33    |
| Overall Increase 1999-2020 (Percent) |                                                           |             |             |             |            | 386.77                   | 250.82   | 119.32   | 580.54  | 403.70   |

*Data Source:* CDC WONDER, Multiple Cause of Death Files; Includes deaths with an underlying cause ICD-10 code of X40-X44, X60-X64, X85, Y10-Y14.

*Note:* Shaded cells indicate the group with the highest fatal drug poisoning rate and highest annual rate of growth in that year.

**Table A6. Fatal Drug Poisoning Rates and Annual Rates of Change for Females ages 35-44, by Race/Ethnicity, 1999-2020**

| Fatal Drug Poisoning Rate (Deaths per 100,000 population) |             |             |            |             |            | Annual Percentage Change |          |          |         |          |
|-----------------------------------------------------------|-------------|-------------|------------|-------------|------------|--------------------------|----------|----------|---------|----------|
| Year                                                      | NH White    | NH Black    | Hispanic   | NH AIAN     | NH Asian   | NH White                 | NH Black | Hispanic | NH AIAN | NH Asian |
| 1999                                                      | 9.3         | 10.4        | 4.8        | 15.5        | 1.4        | ---                      | ---      | ---      | ---     | ---      |
| 2000                                                      | 10.0        | 10.9        | 4.5        | 12.5        | 1.4        | 7.53                     | 4.81     | -6.25    | -19.35  | -2.53    |
| 2001                                                      | 11.7        | 11.4        | 4.5        | 13.1        | 1.0        | 17.00                    | 4.59     | 0.00     | 4.80    | -31.31   |
| 2002                                                      | 14.8        | 12.0        | 5.6        | 19.6        | 1.3        | 26.50                    | 5.26     | 24.44    | 49.62   | 36.00    |
| 2003                                                      | 16.1        | 12.4        | 5.5        | 23.7        | 1.5        | 8.78                     | 3.33     | -1.79    | 20.92   | 10.58    |
| 2004                                                      | 17.9        | 12.7        | 5.5        | 21.3        | 1.1        | 11.18                    | 2.42     | 0.00     | -10.13  | -21.64   |
| 2005                                                      | 17.9        | 13.4        | 5.5        | 21.5        | 1.7        | 0.00                     | 5.51     | 0.00     | 0.94    | 48.22    |
| 2006                                                      | 19.6        | 13.9        | 6.0        | 24.0        | 2.0        | 9.50                     | 3.73     | 9.09     | 11.63   | 20.15    |
| 2007                                                      | 20.6        | 12.0        | 5.1        | 24.3        | 2.6        | 5.10                     | -13.67   | -15.00   | 1.25    | 26.89    |
| 2008                                                      | 22.1        | 10.2        | 5.2        | 23.5        | 1.4        | 7.28                     | -15.00   | 1.96     | -3.29   | -47.18   |
| 2009                                                      | 21.3        | 9.7         | 5.3        | 29.8        | 1.9        | -3.62                    | -4.90    | 1.92     | 26.81   | 39.91    |
| 2010                                                      | 22.9        | 9.9         | 5.6        | 27.2        | 1.6        | 7.51                     | 2.06     | 5.66     | -8.72   | -15.79   |
| 2011                                                      | 24.7        | 10.4        | 6.9        | 34.8        | 3.0        | 7.86                     | 5.05     | 23.21    | 27.94   | 87.50    |
| 2012                                                      | 23.3        | 10.6        | 6.4        | 34.9        | 2.1        | -5.67                    | 1.92     | -7.25    | 0.29    | -30.00   |
| 2013                                                      | 25.2        | 10.2        | 6.5        | 36.8        | 1.6        | 8.15                     | -3.77    | 1.56     | 5.44    | -23.81   |
| 2014                                                      | 27.0        | 12.3        | 5.9        | 38.1        | 2.7        | 7.14                     | 20.59    | -9.23    | 3.53    | 68.75    |
| 2015                                                      | 29.2        | 12.6        | 6.8        | 29.5        | 1.7        | 8.15                     | 2.44     | 15.25    | -22.57  | -37.04   |
| 2016                                                      | 32.6        | 17.2        | 7.8        | 38.4        | 1.8        | 11.64                    | 36.51    | 14.71    | 30.17   | 5.88     |
| 2017                                                      | 35.5        | 18.6        | 8.0        | 40.0        | 2.8        | 8.90                     | 8.14     | 2.56     | 4.17    | 55.56    |
| 2018                                                      | 33.9        | 18.7        | 8.4        | 43.7        | 2.9        | -4.51                    | 0.54     | 5.00     | 9.25    | 3.57     |
| 2019                                                      | 33.1        | 22.1        | 9.1        | 44.3        | 2.2        | -2.36                    | 18.18    | 8.33     | 1.37    | -24.14   |
| 2020                                                      | 42.6        | 32.3        | 12.7       | 65.9        | 3.9        | 28.70                    | 46.15    | 39.56    | 48.76   | 77.27    |
| <i>Overall</i>                                            | <i>22.3</i> | <i>13.8</i> | <i>6.7</i> | <i>29.7</i> | <i>2.1</i> |                          |          |          |         |          |
| Average Annual Percentage Change                          |             |             |            |             |            | 7.85                     | 6.38     | 5.42     | 8.71    | 11.75    |
| Overall Increase 1999-2020 (Percent)                      |             |             |            |             |            | 358.06                   | 210.58   | 164.58   | 325.16  | 170.45   |

*Data Source:* CDC WONDER, Multiple Cause of Death Files; Includes deaths with an underlying cause ICD-10 code of X40-X44, X60-X64, X85, Y10-Y14.

*Note:* Shaded cells indicate the group with the highest fatal drug poisoning rate and highest annual rate of growth in that year.

**Table A7. Fatal Drug Poisoning Rates and Annual Rates of Change for Males ages 45-54, by Race/Ethnicity, 1999-2020**

| Fatal Drug Poisoning Rate (Deaths per 100,000 population) |             |             |             |             |            | Annual Percentage Change |          |          |         |          |
|-----------------------------------------------------------|-------------|-------------|-------------|-------------|------------|--------------------------|----------|----------|---------|----------|
| Year                                                      | NH White    | NH Black    | Hispanic    | NH AIAN     | NH Asian   | NH White                 | NH Black | Hispanic | NH AIAN | NH Asian |
| 1999                                                      | 13.3        | 30.4        | 17.4        | 10.0        | 2.3        | ---                      | ---      | ---      | ---     | ---      |
| 2000                                                      | 14.4        | 29.8        | 14.5        | 13.1        | 2.3        | 8.27                     | -1.97    | -16.67   | 30.57   | 1.32     |
| 2001                                                      | 16.0        | 30.8        | 13.9        | 15.3        | 1.8        | 11.11                    | 3.36     | -4.14    | 16.60   | -24.33   |
| 2002                                                      | 20.0        | 30.7        | 17.4        | 17.7        | 2.1        | 25.00                    | -0.32    | 25.18    | 15.69   | 17.52    |
| 2003                                                      | 22.8        | 30.5        | 18.3        | 19.8        | 3.7        | 14.00                    | -0.65    | 5.17     | 11.86   | 79.50    |
| 2004                                                      | 24.8        | 30.3        | 15.0        | 25.1        | 4.2        | 8.77                     | -0.66    | -18.03   | 26.77   | 13.51    |
| 2005                                                      | 26.5        | 35.1        | 18.0        | 31.3        | 3.7        | 6.85                     | 15.84    | 20.00    | 24.70   | -11.90   |
| 2006                                                      | 30.6        | 41.3        | 19.8        | 34.2        | 4.2        | 15.47                    | 17.66    | 10.00    | 9.27    | 13.51    |
| 2007                                                      | 31.3        | 34.8        | 20.2        | 19.7        | 3.1        | 2.29                     | -15.74   | 2.02     | -42.40  | -26.19   |
| 2008                                                      | 32.8        | 28.7        | 18.1        | 33.4        | 4.4        | 4.79                     | -17.53   | -10.40   | 69.54   | 41.94    |
| 2009                                                      | 32.5        | 27.2        | 17.6        | 35.2        | 4.5        | -0.91                    | -5.23    | -2.76    | 5.39    | 2.27     |
| 2010                                                      | 32.8        | 24.2        | 14.8        | 36.8        | 4.9        | 0.92                     | -11.03   | -15.91   | 4.55    | 8.89     |
| 2011                                                      | 35.2        | 25.8        | 17.1        | 33.9        | 3.8        | 7.32                     | 6.61     | 15.54    | -7.88   | -22.45   |
| 2012                                                      | 35.1        | 26.0        | 17.9        | 37.8        | 4.3        | -0.28                    | 0.78     | 4.68     | 11.50   | 13.16    |
| 2013                                                      | 36.5        | 27.6        | 18.8        | 40.7        | 4.3        | 3.99                     | 6.15     | 5.03     | 7.67    | 0.00     |
| 2014                                                      | 38.5        | 31.6        | 17.1        | 36.9        | 5.1        | 5.48                     | 14.49    | -9.04    | -9.34   | 18.60    |
| 2015                                                      | 41.1        | 34.2        | 18.9        | 41.6        | 5.4        | 6.75                     | 8.23     | 10.53    | 12.74   | 5.88     |
| 2016                                                      | 47.8        | 51.3        | 24.2        | 51.8        | 6.6        | 16.30                    | 50.00    | 28.04    | 24.52   | 22.22    |
| 2017                                                      | 53.5        | 62.7        | 29.7        | 50.9        | 7.4        | 11.92                    | 22.22    | 22.73    | -1.74   | 12.12    |
| 2018                                                      | 50.2        | 63.5        | 29.8        | 57.0        | 7.9        | -6.17                    | 1.28     | 0.34     | 11.98   | 6.76     |
| 2019                                                      | 52.8        | 74.2        | 30.5        | 60.8        | 8.5        | 5.18                     | 16.85    | 2.35     | 6.67    | 7.59     |
| 2020                                                      | 68.2        | 102.3       | 41.3        | 86.1        | 13.2       | 29.17                    | 37.87    | 35.41    | 41.61   | 55.29    |
| <i>Overall</i>                                            | <i>33.8</i> | <i>39.9</i> | <i>21.7</i> | <i>36.3</i> | <i>5.3</i> |                          |          |          |         |          |
| Average Annual Percentage Change                          |             |             |             |             |            | 8.39                     | 7.06     | 5.24     | 12.87   | 11.20    |
| Overall Increase 1999-2020 (Percent)                      |             |             |             |             |            | 412.78                   | 236.51   | 137.36   | 756.75  | 476.98   |

*Data Source:* CDC WONDER, Multiple Cause of Death Files; Includes deaths with an underlying cause ICD-10 code of X40-X44, X60-X64, X85, Y10-Y14.

*Note:* Shaded cells indicate the group with the highest fatal drug poisoning rate and highest annual rate of growth in that year.

**Table A8. Fatal Drug Poisoning Rates and Annual Rates of Change for Females ages 45-54, by Race/Ethnicity, 1999-2020**

| Fatal Drug Poisoning Rate (Deaths per 100,000 population) |             |             |            |             |            | Annual Percentage Change |          |          |         |          |
|-----------------------------------------------------------|-------------|-------------|------------|-------------|------------|--------------------------|----------|----------|---------|----------|
| Year                                                      | NH White    | NH Black    | Hispanic   | NH AIAN     | NH Asian   | NH White                 | NH Black | Hispanic | NH AIAN | NH Asian |
| 1999                                                      | 7.6         | 8.3         | 4.4        | *           | *          | ---                      | ---      | ---      | ---     | ---      |
| 2000                                                      | 8.1         | 9.5         | 3.4        | *           | *          | 6.58                     | 14.46    | -22.73   | *       | *        |
| 2001                                                      | 9.9         | 10.0        | 4.2        | 9.7         | 1.0        | 22.22                    | 5.26     | 23.53    | *       | *        |
| 2002                                                      | 13.4        | 13.4        | 5.8        | 13.1        | 1.4        | 35.35                    | 34.00    | 38.10    | 35.55   | 37.86    |
| 2003                                                      | 14.9        | 14.0        | 6.5        | 13.3        | 1.5        | 11.19                    | 4.48     | 12.07    | 1.53    | 3.28     |
| 2004                                                      | 17.0        | 14.4        | 6.5        | 17.7        | 1.9        | 14.09                    | 2.86     | 0.00     | 33.08   | 24.05    |
| 2005                                                      | 18.8        | 15.7        | 6.9        | 22.9        | 1.9        | 10.59                    | 9.03     | 6.15     | 29.38   | 1.85     |
| 2006                                                      | 21.3        | 17.1        | 8.0        | 23.4        | 2.9        | 13.30                    | 8.92     | 15.94    | 2.18    | 53.61    |
| 2007                                                      | 24.8        | 17.9        | 7.0        | 28.9        | 2.0        | 16.43                    | 4.68     | -12.50   | 23.50   | -31.03   |
| 2008                                                      | 25.4        | 15.2        | 7.3        | 25.8        | 2.2        | 2.42                     | -15.08   | 4.29     | -10.73  | 10.00    |
| 2009                                                      | 26.0        | 16.9        | 8.7        | 27.6        | 1.4        | 2.36                     | 11.18    | 19.18    | 6.98    | -37.22   |
| 2010                                                      | 26.6        | 15.7        | 7.6        | 29.6        | 2.7        | 2.31                     | -7.10    | -12.64   | 7.25    | 95.50    |
| 2011                                                      | 28.7        | 14.6        | 8.3        | 31.9        | 2.6        | 7.89                     | -7.01    | 9.21     | 7.77    | -3.70    |
| 2012                                                      | 28.8        | 16.1        | 9.5        | 34.9        | 2.4        | 0.35                     | 10.27    | 14.46    | 9.40    | -7.69    |
| 2013                                                      | 29.4        | 16.4        | 9.1        | 34.4        | 3.7        | 2.08                     | 1.86     | -4.21    | -1.43   | 54.17    |
| 2014                                                      | 29.9        | 16.5        | 9.0        | 29.3        | 3.1        | 1.70                     | 0.61     | -1.10    | -14.83  | -16.22   |
| 2015                                                      | 31.6        | 18.8        | 9.0        | 40.5        | 2.0        | 5.69                     | 13.94    | 0.00     | 38.23   | -35.48   |
| 2016                                                      | 33.6        | 23.0        | 9.1        | 38.3        | 2.7        | 6.33                     | 22.34    | 1.11     | -5.43   | 35.00    |
| 2017                                                      | 34.6        | 26.6        | 9.1        | 41.3        | 2.5        | 2.98                     | 15.65    | 0.00     | 7.83    | -7.41    |
| 2018                                                      | 31.2        | 24.3        | 8.2        | 42.7        | 3.7        | -9.83                    | -8.65    | -9.89    | 3.39    | 48.00    |
| 2019                                                      | 31.0        | 27.1        | 9.8        | 41.8        | 4.2        | -0.64                    | 11.52    | 19.51    | -2.11   | 13.51    |
| 2020                                                      | 36.5        | 34.4        | 12.1       | 55.5        | 3.7        | 17.74                    | 26.94    | 23.47    | 32.78   | -11.90   |
| <i>Overall</i>                                            | <i>23.8</i> | <i>17.8</i> | <i>8.2</i> | <i>28.4</i> | <i>2.5</i> |                          |          |          |         |          |
| Average Annual Percentage Change                          |             |             |            |             |            | 8.15                     | 7.63     | 5.90     | 10.75   | 11.90    |
| Overall Increase 1999-2020 (Percent)                      |             |             |            |             |            | 380.26                   | 314.46   | 175.00   | 474.28  | 252.57   |

*Data Source:* CDC WONDER, Multiple Cause of Death Files; Includes deaths with an underlying cause ICD-10 code of X40-X44, X60-X64, X85, Y10-Y14.

*Note:* Shaded cells indicate the group with the highest fatal drug poisoning rate and highest annual rate of growth in that year.

\*To conform with CDC suppression rules, rates are not shown for groups in years when there were fewer than 10 deaths in that group. In those cases, the base year for calculating the overall increase is based on the earliest year for which a rate is shown.

**Table A9. Fatal Drug Poisoning Rates and Annual Rates of Change for Males ages 55-64, by Race/Ethnicity, 1999-2020**

| Year                                 | Fatal Drug Poisoning Rate (Deaths per 100,000 population) |             |             |             |            | Annual Percentage Change |          |          |         |          |
|--------------------------------------|-----------------------------------------------------------|-------------|-------------|-------------|------------|--------------------------|----------|----------|---------|----------|
|                                      | NH White                                                  | NH Black    | Hispanic    | NH AIAN     | NH Asian   | NH White                 | NH Black | Hispanic | NH AIAN | NH Asian |
| 1999                                 | 4.0                                                       | 11.3        | 6.5         | *           | *          | ---                      | ---      | ---      | ---     | ---      |
| 2000                                 | 3.9                                                       | 9.4         | 5.0         | *           | *          | -2.50                    | -16.81   | -23.08   | *       | *        |
| 2001                                 | 4.5                                                       | 11.7        | 5.8         | *           | *          | 15.38                    | 24.47    | 16.00    | *       | *        |
| 2002                                 | 6.1                                                       | 15.0        | 6.8         | *           | *          | 35.56                    | 28.21    | 17.24    | *       | *        |
| 2003                                 | 7.4                                                       | 13.3        | 8.3         | *           | *          | 21.31                    | -11.33   | 22.06    | *       | *        |
| 2004                                 | 7.7                                                       | 17.5        | 9.2         | 12.6        | 2.5        | 4.05                     | 31.58    | 10.84    | *       | *        |
| 2005                                 | 9.7                                                       | 21.8        | 10.3        | *           | *          | 25.97                    | 24.57    | 11.96    | *       | *        |
| 2006                                 | 11.0                                                      | 25.7        | 12.3        | 17.1        | 2.2        | 13.40                    | 17.89    | 19.42    | *       | *        |
| 2007                                 | 13.4                                                      | 25.8        | 9.9         | 11.9        | 3.5        | 21.82                    | 0.39     | -19.51   | -30.74  | 59.68    |
| 2008                                 | 14.5                                                      | 24.4        | 11.5        | 18.4        | 1.8        | 8.21                     | -5.43    | 16.16    | 55.49   | -48.57   |
| 2009                                 | 15.6                                                      | 25.7        | 12.7        | 16.0        | 2.4        | 7.59                     | 5.33     | 10.43    | -13.14  | 34.05    |
| 2010                                 | 17.6                                                      | 25.0        | 11.1        | 17.9        | 2.7        | 12.82                    | -2.72    | -12.60   | 11.83   | 12.65    |
| 2011                                 | 18.7                                                      | 26.8        | 12.1        | 22.3        | 4.6        | 6.25                     | 7.20     | 9.01     | 24.58   | 70.37    |
| 2012                                 | 19.6                                                      | 28.1        | 13.8        | 19.6        | 2.4        | 4.81                     | 4.85     | 14.05    | -12.11  | -47.83   |
| 2013                                 | 22.9                                                      | 34.9        | 15.3        | 19.0        | 2.7        | 16.84                    | 24.20    | 10.87    | -3.06   | 12.50    |
| 2014                                 | 24.1                                                      | 33.4        | 14.6        | 31.3        | 4.0        | 5.24                     | -4.30    | -4.58    | 64.74   | 48.15    |
| 2015                                 | 26.1                                                      | 40.7        | 17.3        | 30.5        | 5.5        | 8.30                     | 21.86    | 18.49    | -2.56   | 37.50    |
| 2016                                 | 31.7                                                      | 55.6        | 19.1        | 34.5        | 5.3        | 21.46                    | 36.61    | 10.40    | 13.11   | -3.64    |
| 2017                                 | 34.6                                                      | 70.9        | 21.7        | 32.5        | 4.9        | 9.15                     | 27.52    | 13.61    | -5.80   | -7.55    |
| 2018                                 | 34.4                                                      | 76.0        | 25.3        | 43.7        | 6.9        | -0.58                    | 7.19     | 16.59    | 34.46   | 40.82    |
| 2019                                 | 37.7                                                      | 85.9        | 31.5        | 37.3        | 7.3        | 9.59                     | 13.03    | 24.51    | -14.65  | 5.80     |
| 2020                                 | 46.8                                                      | 114.0       | 39.8        | 55.1        | 9.8        | 24.14                    | 32.71    | 26.35    | 47.72   | 34.25    |
| <i>Overall</i>                       | <i>20.2</i>                                               | <i>41.7</i> | <i>17.3</i> | <i>23.6</i> | <i>4.1</i> |                          |          |          |         |          |
| Average Annual Percentage Change     |                                                           |             |             |             |            | 12.80                    | 12.71    | 9.92     | 12.13   | 17.73    |
| Overall Increase 1999-2020 (Percent) |                                                           |             |             |             |            | 1070.00                  | 908.85   | 512.31   | 337.49  | 294.55   |

*Data Source:* CDC WONDER, Multiple Cause of Death Files; Includes deaths with an underlying cause ICD-10 code of X40-X44, X60-X64, X85, Y10-Y14.

*Note:* Shaded cells indicate the group with the highest fatal drug poisoning rate and highest annual rate of growth in that year.

\*To conform with CDC suppression rules, rates are not shown for groups in years when there were fewer than 10 deaths in that group. In those cases, the base year for calculating the overall increase is based on the earliest year for which a rate is shown.

**Table A10. Fatal Drug Poisoning Rates and Annual Rates of Change for Females ages 55-64, by Race/Ethnicity, 1999-2020**

| Year                                 | Fatal Drug Poisoning Rate (Deaths per 100,000 population) |          |          |         |          | Annual Percentage Change |          |          |         |          |
|--------------------------------------|-----------------------------------------------------------|----------|----------|---------|----------|--------------------------|----------|----------|---------|----------|
|                                      | NH White                                                  | NH Black | Hispanic | NH AIAN | NH Asian | NH White                 | NH Black | Hispanic | NH AIAN | NH Asian |
| 1999                                 | 3.9                                                       | 1.8      | 1.7      | *       | *        | ---                      | ---      | ---      | ---     | ---      |
| 2000                                 | 4.4                                                       | 2.3      | 2.6      | *       | *        | 12.82                    | 27.78    | 50.59    | *       | *        |
| 2001                                 | 4.8                                                       | 2.9      | 1.8      | *       | *        | 9.09                     | 26.09    | -32.53   | *       | *        |
| 2002                                 | 5.9                                                       | 3.9      | 2.5      | *       | *        | 22.92                    | 34.48    | 42.51    | *       | *        |
| 2003                                 | 6.9                                                       | 4.0      | 2.5      | 10.3    | 2.1      | 16.95                    | 2.56     | 0.00     | *       | *        |
| 2004                                 | 7.8                                                       | 5.3      | 3.9      | 10.7    | 1.6      | 13.04                    | 32.50    | 56.00    | 4.13    | -23.16   |
| 2005                                 | 8.5                                                       | 6.5      | 2.8      | *       | *        | 8.97                     | 22.64    | -28.21   | *       | *        |
| 2006                                 | 10.0                                                      | 7.5      | 3.7      | 9.6     | *        | 17.65                    | 15.38    | 32.14    | *       | *        |
| 2007                                 | 11.7                                                      | 9.1      | 4.9      | 25.1    | 1.3      | 17.00                    | 21.33    | 32.43    | 160.62  | *        |
| 2008                                 | 12.8                                                      | 8.3      | 4.3      | 13.6    | *        | 9.40                     | -8.79    | -12.24   | -45.70  | *        |
| 2009                                 | 13.5                                                      | 8.5      | 4.0      | 11.5    | 1.6      | 5.47                     | 2.41     | -6.98    | -15.57  | *        |
| 2010                                 | 14.8                                                      | 9.9      | 5.5      | 16.3    | 2.5      | 9.63                     | 16.47    | 37.50    | 41.54   | 50.08    |
| 2011                                 | 15.3                                                      | 11.3     | 6.3      | 19.5    | 1.6      | 3.38                     | 14.14    | 14.55    | 19.63   | -35.89   |
| 2012                                 | 16.3                                                      | 10.8     | 5.2      | 22.9    | 2.1      | 6.54                     | -4.42    | -17.46   | 17.44   | 34.02    |
| 2013                                 | 18.6                                                      | 12.4     | 6.1      | 25.4    | 1.4      | 14.11                    | 14.81    | 17.31    | 10.92   | -31.28   |
| 2014                                 | 20.0                                                      | 14.8     | 6.4      | 19.0    | 1.9      | 7.53                     | 19.35    | 4.92     | -25.20  | 34.15    |
| 2015                                 | 20.7                                                      | 14.2     | 6.9      | 22.7    | 1.1      | 3.50                     | -4.05    | 7.81     | 19.47   | -45.01   |
| 2016                                 | 22.1                                                      | 19.9     | 8.4      | 22.6    | 2.4      | 6.76                     | 40.14    | 21.74    | -0.44   | 124.78   |
| 2017                                 | 23.3                                                      | 21.9     | 7.4      | 18.1    | 2.4      | 5.43                     | 10.05    | -11.90   | -19.91  | 0.00     |
| 2018                                 | 22.0                                                      | 24.7     | 9.2      | 26.4    | 2.1      | -5.58                    | 12.79    | 24.32    | 45.86   | -12.50   |
| 2019                                 | 22.1                                                      | 25.7     | 9.3      | 27.3    | 1.9      | 0.45                     | 4.05     | 1.09     | 3.41    | -9.52    |
| 2020                                 | 25.1                                                      | 33.1     | 10.3     | 30.6    | 2.7      | 13.57                    | 28.79    | 10.75    | 12.09   | 42.11    |
| Overall                              | 15.0                                                      | 13.6     | 6.1      | 17.9    | 1.8      |                          |          |          |         |          |
| Average Annual Percentage Change     |                                                           |          |          |         |          | 9.46                     | 15.64    | 11.64    | 15.22   | 10.65    |
| Overall Increase 1999-2020 (Percent) |                                                           |          |          |         |          | 543.59                   | 1738.89  | 496.58   | 198.26  | 26.71    |

*Data Source:* CDC WONDER, Multiple Cause of Death Files; Includes deaths with an underlying cause ICD-10 code of X40-X44, X60-X64, X85, Y10-Y14.

*Note:* Shaded cells indicate the group with the highest fatal drug poisoning rate and highest annual rate of growth in that year.

\*To conform with CDC suppression rules, rates are not shown for groups in years when there were fewer than 10 deaths in that group. In those cases, the base year for calculating the overall increase is based on the earliest year for which a rate is shown.

**Table A11. Fatal Drug Poisoning Rates and Annual Rates of Change for Males ages 65+, by Race/Ethnicity, 1999-2020**

| Year                                 | Fatal Drug Poisoning Rate (Deaths per 100,000 population) |             |            |            |            | Annual Percentage Change |          |          |         |          |
|--------------------------------------|-----------------------------------------------------------|-------------|------------|------------|------------|--------------------------|----------|----------|---------|----------|
|                                      | NH White                                                  | NH Black    | Hispanic   | NH AIAN    | NH Asian   | NH White                 | NH Black | Hispanic | NH AIAN | NH Asian |
| 1999                                 | 2.8                                                       | 3.2         | 2.9        | *          | *          | ---                      | ---      | ---      | ---     | ---      |
| 2000                                 | 2.5                                                       | 3.7         | 2.1        | *          | *          | -10.71                   | 15.63    | -28.84   | *       | *        |
| 2001                                 | 2.7                                                       | 3.8         | 2.5        | *          | *          | 8.00                     | 2.70     | 19.25    | *       | *        |
| 2002                                 | 3.0                                                       | 3.3         | 3.1        | *          | 3.1        | 11.11                    | -13.16   | 25.97    | *       | *        |
| 2003                                 | 2.9                                                       | 5.6         | 3.2        | *          | *          | -3.33                    | 69.70    | 3.23     | *       | *        |
| 2004                                 | 2.9                                                       | 4.8         | 3.5        | *          | *          | 0.00                     | -14.29   | 9.37     | *       | *        |
| 2005                                 | 3.4                                                       | 5.4         | 3.2        | *          | 2.4        | 17.24                    | 12.50    | -8.57    | *       | *        |
| 2006                                 | 3.4                                                       | 5.9         | 2.8        | *          | *          | 0.00                     | 9.26     | -12.50   | *       | *        |
| 2007                                 | 3.9                                                       | 6.4         | 3.6        | *          | *          | 14.71                    | 8.47     | 28.57    | *       | *        |
| 2008                                 | 4.1                                                       | 6.5         | 3.3        | *          | *          | 5.13                     | 1.56     | -8.33    | *       | *        |
| 2009                                 | 4.5                                                       | 5.5         | 3.4        | *          | 2.5        | 9.76                     | -15.38   | 3.03     | *       | *        |
| 2010                                 | 4.2                                                       | 6.7         | 3.7        | *          | 1.7        | -6.67                    | 21.82    | 8.82     | *       | -29.59   |
| 2011                                 | 4.8                                                       | 5.8         | 2.8        | *          | 1.8        | 14.29                    | -13.43   | -24.32   | *       | 1.43     |
| 2012                                 | 5.2                                                       | 7.3         | 3.9        | *          | 2.2        | 8.33                     | 25.86    | 39.29    | *       | 24.25    |
| 2013                                 | 5.7                                                       | 9.9         | 4.5        | *          | 1.9        | 9.62                     | 35.62    | 15.38    | *       | -12.95   |
| 2014                                 | 5.8                                                       | 10.2        | 4.6        | *          | 2.0        | 1.75                     | 3.03     | 2.22     | *       | 4.75     |
| 2015                                 | 6.5                                                       | 13.1        | 5.2        | *          | 2.5        | 12.07                    | 28.43    | 13.04    | *       | 25.72    |
| 2016                                 | 6.8                                                       | 19.7        | 4.9        | *          | 2.2        | 4.62                     | 50.38    | -5.77    | *       | -12.95   |
| 2017                                 | 7.4                                                       | 24.9        | 6.8        | *          | 1.5        | 8.82                     | 26.40    | 38.78    | *       | -28.82   |
| 2018                                 | 8.4                                                       | 30.8        | 7.9        | 9.9        | 2.8        | 13.51                    | 23.69    | 16.18    | *       | 80.93    |
| 2019                                 | 9.3                                                       | 36.2        | 8.7        | 8.7        | 2.3        | 10.71                    | 17.53    | 10.13    | -11.63  | -17.86   |
| 2020                                 | 10.4                                                      | 47.4        | 11.3       | 12.8       | 3.4        | 11.83                    | 30.94    | 29.89    | 46.38   | 47.83    |
| <i>Overall</i>                       | <i>5.4</i>                                                | <i>14.6</i> | <i>5.1</i> | <i>6.1</i> | <i>2.1</i> |                          |          |          |         |          |
| Average Annual Percentage Change     |                                                           |             |            |            |            | 6.70                     | 15.58    | 8.32     | 17.38   | 7.52     |
| Overall Increase 1999-2020 (Percent) |                                                           |             |            |            |            | 271.43                   | 1381.25  | 289.66   |         | 8.30     |

*Data Source:* CDC WONDER, Multiple Cause of Death Files; Includes deaths with an underlying cause ICD-10 code of X40-X44, X60-X64, X85, Y10-Y14.

*Note:* Shaded cells indicate the group with the highest fatal drug poisoning rate and highest annual rate of growth in that year.

\*To conform with CDC suppression rules, rates are not shown for groups in years when there were fewer than 10 deaths in that group. In those cases, the base year for calculating the overall increase is based on the earliest year for which a rate is shown.

**Table A12. Fatal Drug Poisoning Rates and Annual Rates of Change for Females ages 65+, by Race/Ethnicity, 1999-2020**

| Year                                 | Fatal Drug Poisoning Rate (Deaths per 100,000 population) |          |          |         |          | Annual Percentage Change |          |          |         |          |
|--------------------------------------|-----------------------------------------------------------|----------|----------|---------|----------|--------------------------|----------|----------|---------|----------|
|                                      | NH White                                                  | NH Black | Hispanic | NH AIAN | NH Asian | NH White                 | NH Black | Hispanic | NH AIAN | NH Asian |
| 1999                                 | 2.8                                                       | 1.9      | 1.2      | *       | *        | ---                      | ---      | ---      | ---     | ---      |
| 2000                                 | 2.6                                                       | 1.7      | 1.3      | *       | *        | -7.14                    | -10.53   | 3.89     | *       | *        |
| 2001                                 | 2.6                                                       | 1.9      | 1.4      | *       | *        | 0.00                     | 11.76    | 8.70     | *       | *        |
| 2002                                 | 3.1                                                       | 1.4      | 2.0      | *       | 2.0      | 19.23                    | -26.32   | 42.48    | *       | *        |
| 2003                                 | 3.2                                                       | 1.6      | 1.8      | *       | *        | 3.23                     | 14.29    | -10.00   | *       | *        |
| 2004                                 | 3.3                                                       | 1.8      | 1.9      | *       | 1.6      | 3.12                     | 12.50    | 5.56     | *       | *        |
| 2005                                 | 3.4                                                       | 1.8      | 2.3      | *       | 1.5      | 3.03                     | 0.00     | 21.05    | *       | -5.34    |
| 2006                                 | 3.8                                                       | 2.5      | 2.1      | *       | 2.3      | 11.76                    | 38.89    | -8.70    | *       | 51.92    |
| 2007                                 | 4.0                                                       | 2.5      | 1.2      | *       | 1.4      | 5.26                     | 0.00     | -42.14   | *       | -40.63   |
| 2008                                 | 4.4                                                       | 2.3      | 2.3      | *       | 1.3      | 10.00                    | -8.00    | 89.29    | *       | -4.91    |
| 2009                                 | 4.8                                                       | 2.0      | 2.7      | *       | 2.2      | 9.09                     | -13.04   | 17.39    | *       | 70.94    |
| 2010                                 | 4.7                                                       | 2.3      | 2.9      | *       | 1.3      | -2.08                    | 15.00    | 7.41     | *       | -41.27   |
| 2011                                 | 5.0                                                       | 2.6      | 2.6      | *       | 1.6      | 6.38                     | 13.04    | -10.34   | *       | 18.64    |
| 2012                                 | 5.2                                                       | 2.5      | 2.3      | *       | 1.4      | 4.00                     | -3.85    | -11.54   | *       | -13.64   |
| 2013                                 | 5.4                                                       | 2.7      | 2.5      | *       | 1.0      | 3.85                     | 8.00     | 8.70     | *       | -28.43   |
| 2014                                 | 5.9                                                       | 3.2      | 2.3      | *       | 1.3      | 9.26                     | 18.52    | -8.00    | *       | 38.88    |
| 2015                                 | 5.5                                                       | 3.4      | 2.4      | *       | 1.8      | -6.78                    | 6.25     | 4.35     | *       | 36.24    |
| 2016                                 | 5.7                                                       | 4.2      | 2.1      | 8.9     | 1.2      | 3.64                     | 23.53    | -12.50   | *       | -35.16   |
| 2017                                 | 6.2                                                       | 4.4      | 2.4      | *       | 2.2      | 8.77                     | 4.76     | 14.29    | *       | 86.62    |
| 2018                                 | 6.1                                                       | 5.7      | 2.7      | *       | 1.3      | -1.61                    | 29.55    | 12.50    | *       | -39.62   |
| 2019                                 | 6.2                                                       | 6.8      | 2.4      | 9.8     | 1.5      | 1.64                     | 19.30    | -11.11   | *       | 12.09    |
| 2020                                 | 6.3                                                       | 7.9      | 3.0      | *       | 2.2      | 1.61                     | 16.18    | 25.00    | *       | 46.67    |
| Overall                              | 4.7                                                       | 3.4      | 2.3      | 4.6     | 1.6      |                          |          |          |         |          |
| Average Annual Percentage Change     |                                                           |          |          |         |          | 4.11                     | 8.09     | 6.97     |         | 9.56     |
| Overall Increase 1999-2020 (Percent) |                                                           |          |          |         |          | 125.00                   | 315.79   | 141.36   |         | 11.29    |

*Data Source:* CDC WONDER, Multiple Cause of Death Files; Includes deaths with an underlying cause ICD-10 code of X40-X44, X60-X64, X85, Y10-Y14.

*Note:* Shaded cells indicate the group with the highest fatal drug poisoning rate and highest annual rate of growth in that year.

\*To conform with CDC suppression rules, rates are not shown for groups in years when there were fewer than 10 deaths in that group. In those cases, the base year for calculating the overall increase is based on the earliest year for which a rate is shown.



**Table A13. Demographic Ranking of Overall Fatal Drug Poisoning Rates (deaths per 100,000 population), 1999-2020**

|    |                          |      |    |                            |     |
|----|--------------------------|------|----|----------------------------|-----|
| 1  | Black Male ages 55-64    | 41.7 | 31 | Black Female ages 25-34    | 8.4 |
| 2  | AIAN Male ages 35-44     | 41.2 | 32 | Hispanic Female ages 45-54 | 8.2 |
| 3  | Black Male ages 45-54    | 39.9 | 33 | Hispanic Male ages 15-24   | 7.0 |
| 4  | White Male ages 25-34    | 39.6 | 34 | AIAN Female ages 15-24     | 6.7 |
| 5  | White Male ages 35-44    | 38.6 | 35 | Hispanic Female ages 35-44 | 6.7 |
| 6  | AIAN Male ages 25-34     | 37.7 | 36 | White Female ages 15-24    | 6.3 |
| 7  | AIAN Male ages 45-54     | 36.3 | 37 | Hispanic Female ages 55-64 | 6.1 |
| 8  | White Male ages 45-54    | 33.8 | 38 | AIAN Male ages 65+         | 6.1 |
| 9  | AIAN Female ages 35-44   | 29.7 | 39 | Asian Male ages 25-34      | 5.7 |
| 10 | Black Male ages 35-44    | 29.1 | 40 | Asian Male ages 35-44      | 5.4 |
| 11 | AIAN Female ages 45-54   | 28.4 | 41 | White Male ages 65+        | 5.4 |
| 12 | White Female ages 45-54  | 23.8 | 42 | Asian Male ages 45-54      | 5.3 |
| 13 | AIAN Male ages 55-64     | 23.6 | 43 | Hispanic Female ages 25-34 | 5.1 |
| 14 | AIAN Female ages 25-34   | 22.6 | 44 | Hispanic Male ages 65+     | 5.1 |
| 15 | White Female ages 35-44  | 22.3 | 45 | Black Male ages 15-24      | 5.0 |
| 16 | Hispanic Male ages 45-54 | 21.7 | 46 | White Female ages 65+      | 4.7 |
| 17 | White Male ages 55-64    | 20.2 | 47 | AIAN Female ages 65+       | 4.6 |
| 18 | Hispanic Male ages 35-44 | 20.0 | 48 | Asian Male ages 55-64      | 4.1 |
| 19 | Black Male ages 25-34    | 19.4 | 49 | Asian Male ages 15-24      | 3.4 |
| 20 | AIAN Female ages 55-64   | 17.9 | 50 | Black Female ages 65+      | 3.4 |
| 21 | Black Female ages 45-54  | 17.8 | 51 | Black Female ages 15-24    | 2.5 |
| 22 | White Female ages 25-34  | 17.4 | 52 | Asian Female ages 45-54    | 2.5 |
| 23 | Hispanic Male ages 55-64 | 17.3 | 53 | Hispanic Female ages 15-24 | 2.4 |
| 24 | Hispanic Male ages 25-34 | 16.0 | 54 | Hispanic Female ages 65+   | 2.3 |
| 25 | White Male ages 15-24    | 15.9 | 55 | Asian Female ages 35-44    | 2.1 |
| 26 | White Female ages 55-64  | 15.0 | 56 | Asian Male ages 65+        | 2.1 |
| 27 | Black Male ages 65+      | 14.6 | 57 | Asian Female ages 25-34    | 2.0 |
| 28 | Black Female ages 35-44  | 13.8 | 58 | Asian Female ages 55-64    | 1.8 |
| 29 | AIAN Male ages 15-24     | 13.6 | 59 | Asian Female ages 15-24    | 1.6 |
| 30 | Black Female ages 55-64  | 13.6 | 60 | Asian Female ages 65+      | 1.6 |

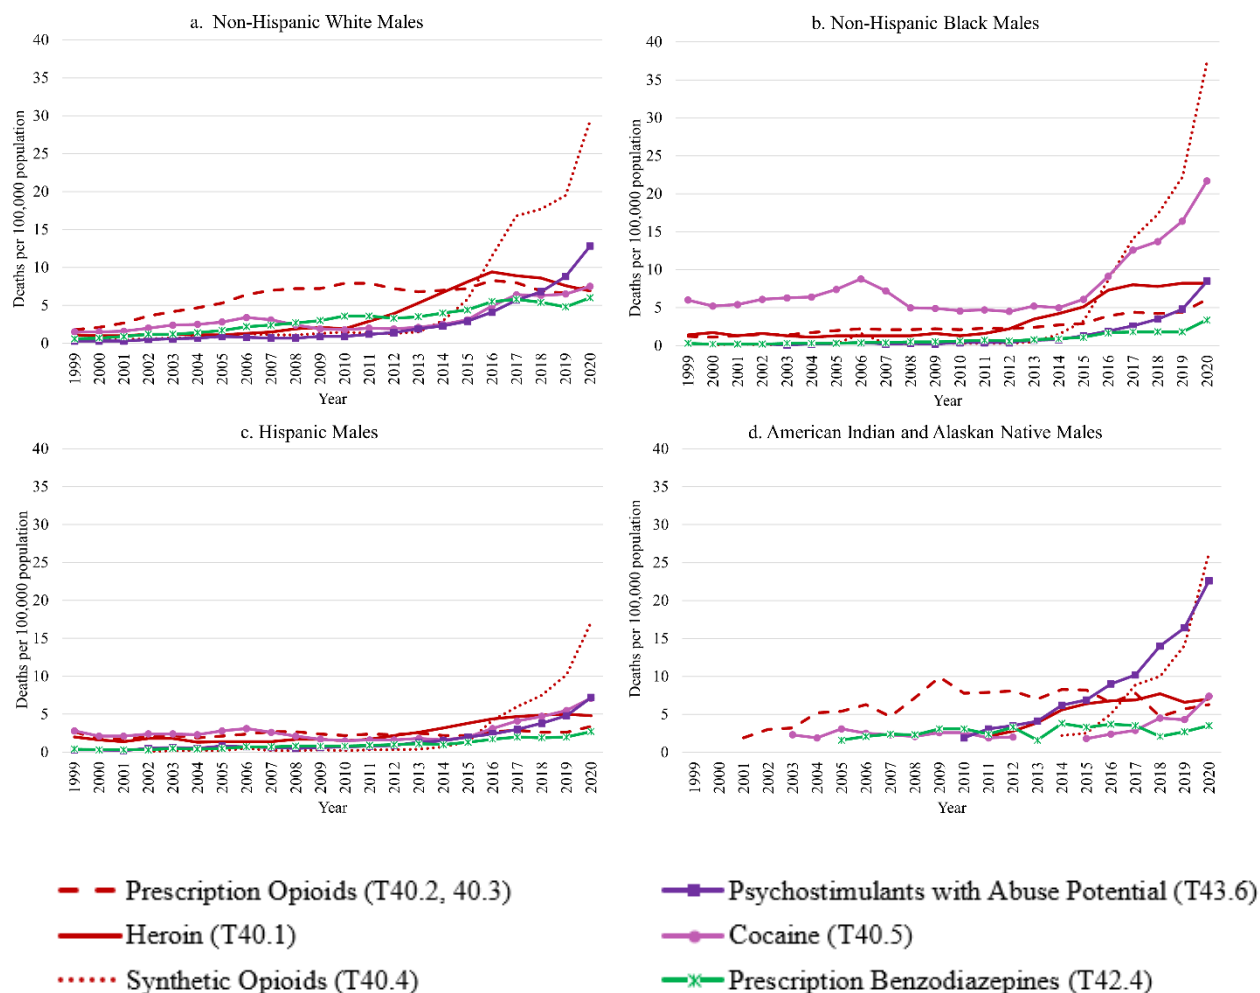

**Figure A1. Fatal Drug Poisoning Rates by Drug Type for Males by Race/Ethnicity, 1999-2020**

*Data Source:* CDC WONDER, Multiple Cause of Death Files

*Notes:* Rates are age-adjusted; Includes deaths with an underlying cause ICD-10 code of X40-X44, X60-X64, X85, Y10-Y14. T-codes represent the drug involved in the overdose, based on multiple cause of death coding. Categories are not mutually exclusive because deaths may involve more than one drug. Asians are excluded due to small death counts by drug type. To conform with CDC suppression rules, rates are not shown for certain groups in years when there were fewer than 20 deaths in that group.

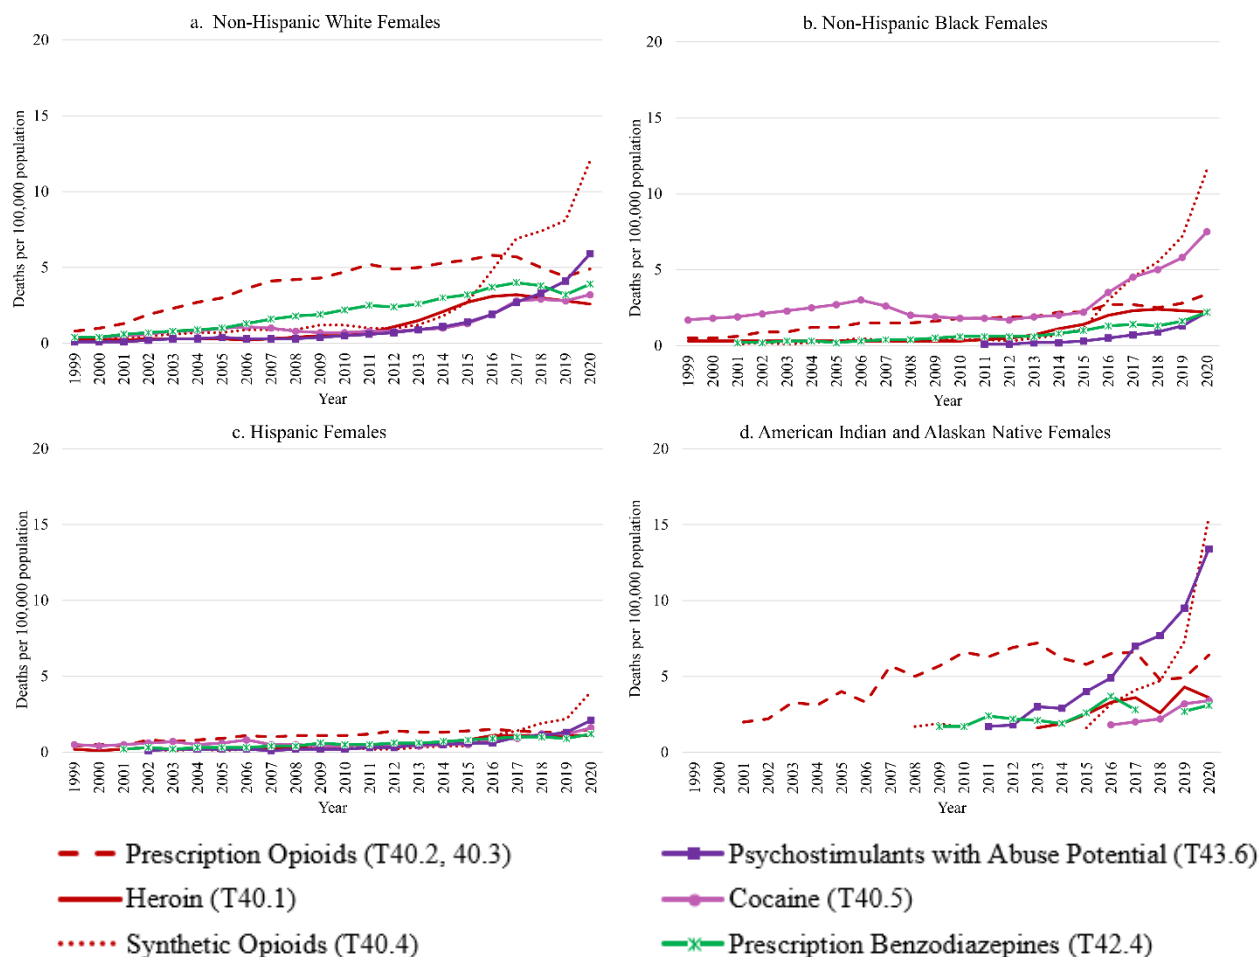

**Figure A2. Fatal Drug Poisoning Rates by Drug Type for Females by Race/Ethnicity, 1999-2020**

*Data Source:* CDC WONDER, Multiple Cause of Death Files

*Notes:* Rates are age-adjusted; Includes deaths with an underlying cause ICD-10 code of X40-X44, X60-X64, X85, Y10-Y14. T-codes represent the drug involved in the overdose, based on multiple cause of death coding. Categories are not mutually exclusive because deaths may involve more than one drug. Asians are excluded due to small death counts by drug type. To conform with CDC suppression rules, rates are not shown for certain groups in years when there were fewer than 20 deaths in that group.

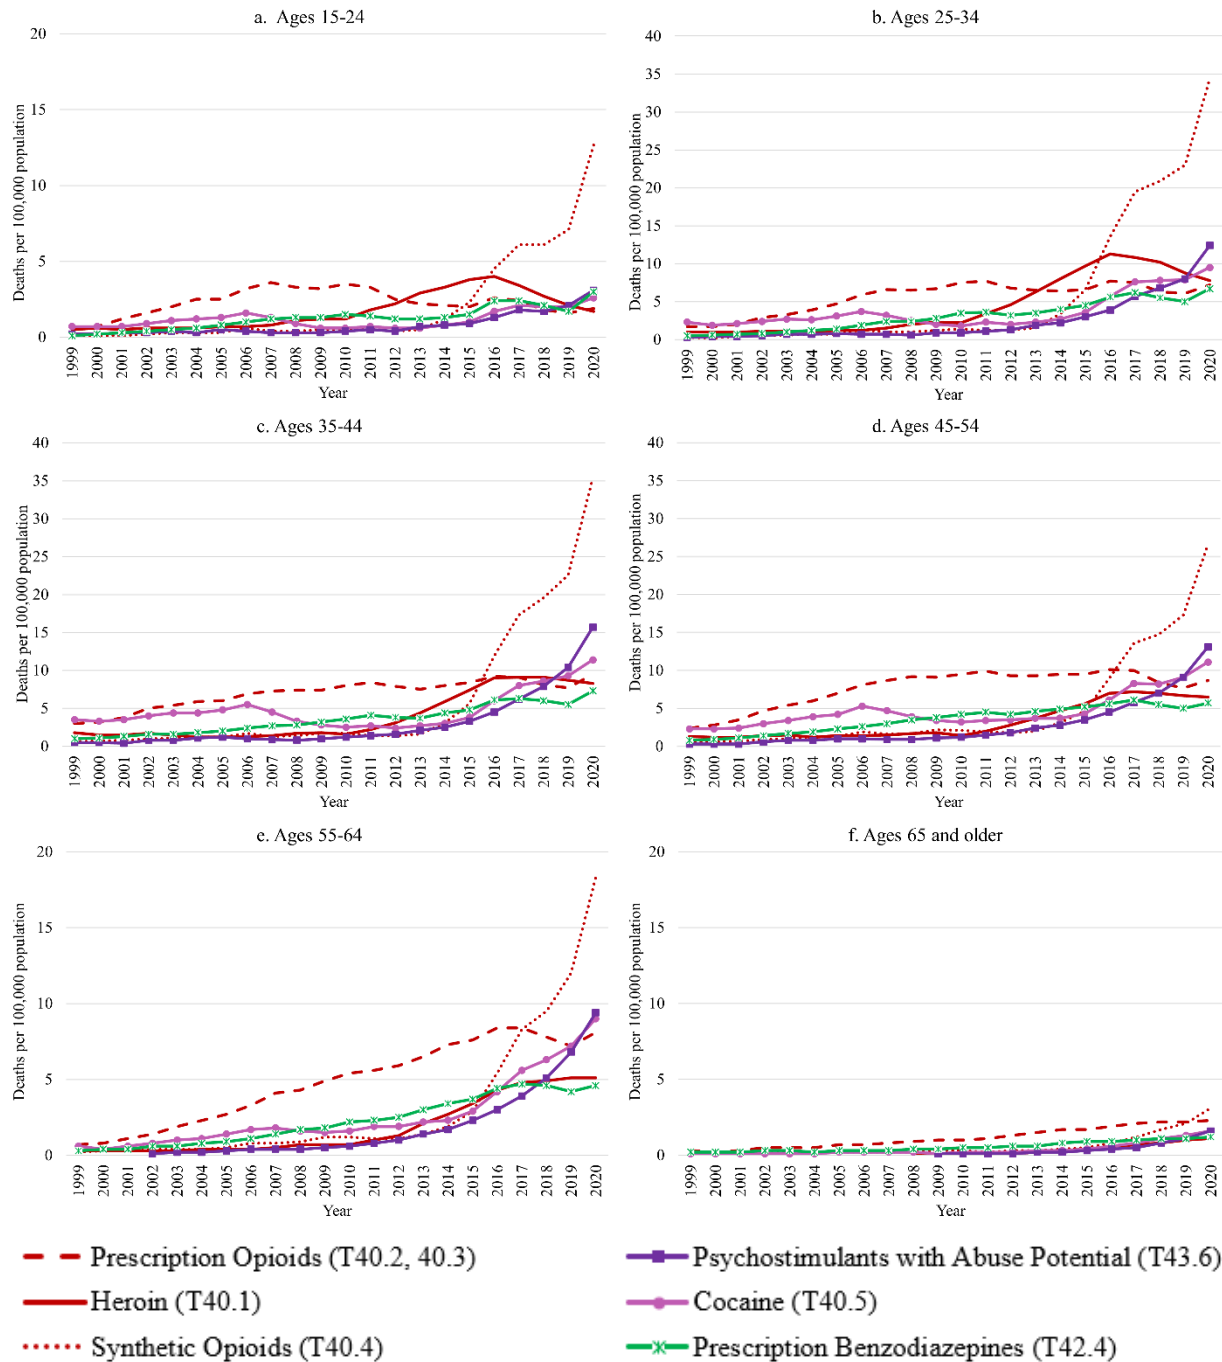

**Figure A3. Fatal Drug Poisonings by Drug Type by Age Group, 1999-2020**

*Data Source:* CDC WONDER, Multiple Cause of Death Files

*Notes:* Includes deaths with an underlying cause ICD-10 code of X40-X44, X60-X64, X85, Y10-Y14. T-codes represent the drug involved in the overdose, based on multiple cause of death coding. Categories are not mutually exclusive because deaths may involve more than one drug. Asians are excluded due to small death counts by drug type. To conform with CDC suppression rules, rates are not shown for certain groups in years when there were fewer than 20 deaths in that group.

Table B1. Fatal Drug Poisoning Rates (age-adjusted) and Annual Rates of Change by Region, 1999-2020

| Fatal Drug Poisoning Rate (Deaths per 100,000 population) |           |         |       |      | Annual Percentage Change |         |        |        |
|-----------------------------------------------------------|-----------|---------|-------|------|--------------------------|---------|--------|--------|
| Year                                                      | Northeast | Midwest | South | West | Northeast                | Midwest | South  | West   |
| 1999                                                      | 6.5       | 4.4     | 5.4   | 8.5  |                          |         |        |        |
| 2000                                                      | 6.6       | 4.9     | 6.1   | 7.3  | 1.54                     | 11.36   | 12.96  | -14.12 |
| 2001                                                      | 7.4       | 5.7     | 7.6   | 6.2  | 12.12                    | 16.33   | 24.59  | -15.07 |
| 2002                                                      | 7.9       | 6.6     | 8.4   | 9.7  | 6.76                     | 15.79   | 10.53  | 56.45  |
| 2003                                                      | 8.5       | 6.7     | 9.6   | 10.3 | 7.59                     | 1.52    | 14.29  | 6.19   |
| 2004                                                      | 8.0       | 8.1     | 10.2  | 10.5 | -5.88                    | 20.90   | 6.25   | 1.94   |
| 2005                                                      | 9.0       | 8.9     | 10.7  | 11.1 | 12.50                    | 9.88    | 4.90   | 5.71   |
| 2006                                                      | 11.1      | 10.7    | 12.1  | 11.7 | 23.33                    | 20.22   | 13.08  | 5.41   |
| 2007                                                      | 10.9      | 10.7    | 12.5  | 12.8 | -1.80                    | 0.00    | 3.31   | 9.40   |
| 2008                                                      | 10.7      | 11.4    | 12.4  | 12.6 | -1.83                    | 6.54    | -0.80  | -1.56  |
| 2009                                                      | 9.9       | 11.4    | 12.7  | 13.0 | -7.48                    | 0.00    | 2.42   | 3.17   |
| 2010                                                      | 10.6      | 12.3    | 13.0  | 12.7 | 7.07                     | 7.89    | 2.36   | -2.31  |
| 2011                                                      | 12.7      | 13.1    | 13.4  | 13.5 | 19.81                    | 6.50    | 3.08   | 6.30   |
| 2012                                                      | 13.5      | 13.6    | 12.9  | 13.1 | 6.30                     | 3.82    | -3.73  | -2.96  |
| 2013                                                      | 14.8      | 14.6    | 13.1  | 13.6 | 9.63                     | 7.35    | 1.55   | 3.82   |
| 2014                                                      | 16.1      | 16.0    | 14.0  | 13.7 | 8.78                     | 9.59    | 6.87   | 0.74   |
| 2015                                                      | 19.8      | 17.8    | 15.5  | 13.9 | 22.98                    | 11.25   | 10.71  | 1.46   |
| 2016                                                      | 26.6      | 22.3    | 19.0  | 14.1 | 34.34                    | 25.28   | 22.58  | 1.44   |
| 2017                                                      | 29.8      | 25.4    | 20.7  | 14.7 | 12.03                    | 13.90   | 8.95   | 4.26   |
| 2018                                                      | 28.1      | 22.9    | 19.7  | 15.3 | -5.70                    | -9.84   | -4.83  | 4.08   |
| 2019                                                      | 27.9      | 23.8    | 20.7  | 17.0 | -0.71                    | 3.93    | 5.08   | 11.11  |
| 2020                                                      | 32.9      | 29.9    | 28.6  | 23.4 | 17.92                    | 25.63   | 38.16  | 37.65  |
| Average Annual Percentage Change                          |           |         |       |      | 8.54                     | 9.90    | 8.68   | 5.86   |
| Overall Increase 1999-2020 (Percent)                      |           |         |       |      | 406.15                   | 579.55  | 429.63 | 175.29 |

*Data Source:* CDC WONDER, Multiple Cause of Death Files; Includes deaths with an underlying cause ICD-10 code of X40-X44, X60-X64, X85, Y10-Y14. Rates are age adjusted.

*Note:* Shaded cells indicate the region with the highest fatal drug poisoning rate and highest annual rate of growth in that year.

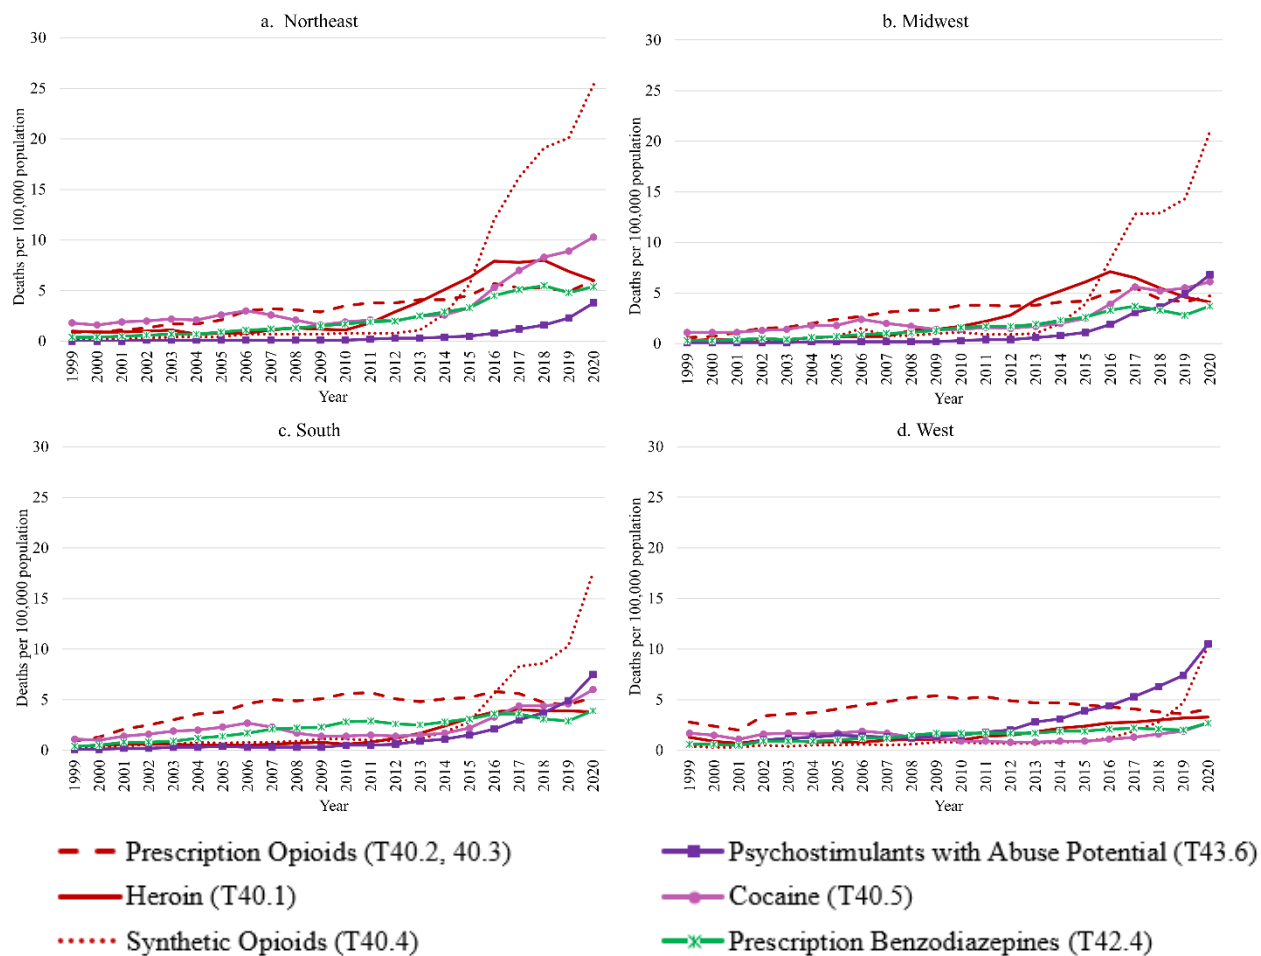

**Figure B1. Fatal Drug Poisonings by Drug Type by Census Region, 1999-2020**

*Data Source:* CDC WONDER, Multiple Cause of Death Files

*Notes:* Rates are age-adjusted. Includes deaths with an underlying cause ICD-10 code of X40-X44, X60-X64, X85, Y10-Y14. T-codes represent the drug involved in the overdose, based on multiple cause of death coding. Categories are not mutually exclusive because deaths may involve more than one drug.

Table B2. Fatal Drug Poisoning Rates (age-adjusted) and Annual Rates of Change by Urban-Rural Continuum, 1999-2020

| Fatal Drug Poisoning Rate (Deaths per 100,000 population) |                     |                    |           |             |                       |                  | Annual Percentage Change |                    |           |             |                       |                  |
|-----------------------------------------------------------|---------------------|--------------------|-----------|-------------|-----------------------|------------------|--------------------------|--------------------|-----------|-------------|-----------------------|------------------|
| Year                                                      | Large Central Metro | Large Fringe Metro | Med Metro | Small Metro | Micropolitan Nonmetro | NonCore Nonmetro | Large Central Metro      | Large Fringe Metro | Med Metro | Small Metro | Micropolitan Nonmetro | NonCore Nonmetro |
| 1999                                                      | 8.3                 | 5.0                | 6.1       | 4.5         | 4.2                   | 3.7              |                          |                    |           |             |                       |                  |
| 2000                                                      | 7.7                 | 5.5                | 6.5       | 4.9         | 4.7                   | 4.5              | -7.23                    | 10.00              | 6.56      | 8.89        | 11.90                 | 21.62            |
| 2001                                                      | 7.8                 | 6.4                | 7.2       | 6.0         | 5.7                   | 5.6              | 1.30                     | 16.36              | 10.77     | 22.45       | 21.28                 | 24.44            |
| 2002                                                      | 9.5                 | 7.4                | 8.8       | 7.1         | 7.0                   | 6.9              | 21.79                    | 15.63              | 22.22     | 18.33       | 22.81                 | 23.21            |
| 2003                                                      | 9.6                 | 8.1                | 9.9       | 8.4         | 8.3                   | 8.0              | 1.05                     | 9.46               | 12.50     | 18.31       | 18.57                 | 15.94            |
| 2004                                                      | 10.0                | 8.0                | 10.5      | 9.1         | 9.5                   | 9.1              | 4.17                     | -1.23              | 6.06      | 8.33        | 14.46                 | 13.75            |
| 2005                                                      | 10.7                | 8.8                | 11.3      | 9.7         | 9.9                   | 9.9              | 7.00                     | 10.00              | 7.62      | 6.59        | 4.21                  | 8.79             |
| 2006                                                      | 12.0                | 10.4               | 12.5      | 11.1        | 12.1                  | 11.2             | 12.15                    | 18.18              | 10.62     | 14.43       | 22.22                 | 13.13            |
| 2007                                                      | 12.1                | 10.7               | 13.0      | 12.1        | 12.4                  | 12.2             | 0.83                     | 2.88               | 4.00      | 9.01        | 2.48                  | 8.93             |
| 2008                                                      | 11.4                | 11.2               | 13.4      | 12.0        | 12.8                  | 12.6             | -5.79                    | 4.67               | 3.08      | -0.83       | 3.23                  | 3.28             |
| 2009                                                      | 11.4                | 11.1               | 13.4      | 12.5        | 12.9                  | 13.0             | 0.00                     | -0.89              | 0.00      | 4.17        | 0.78                  | 3.17             |
| 2010                                                      | 11.3                | 11.6               | 14.0      | 12.7        | 13.2                  | 14.2             | -0.88                    | 4.50               | 4.48      | 1.60        | 2.33                  | 9.23             |
| 2011                                                      | 12.1                | 12.7               | 14.4      | 14.0        | 14.7                  | 14.7             | 7.08                     | 9.48               | 2.86      | 10.24       | 11.36                 | 3.52             |
| 2012                                                      | 12.4                | 12.9               | 14.1      | 13.9        | 14.4                  | 14.1             | 2.48                     | 1.57               | -2.08     | -0.71       | -2.04                 | -4.08            |
| 2013                                                      | 13.0                | 13.7               | 14.8      | 14.5        | 14.6                  | 14.7             | 4.84                     | 6.20               | 4.96      | 4.32        | 1.39                  | 4.26             |
| 2014                                                      | 13.5                | 14.8               | 16.0      | 15.6        | 16.0                  | 15.0             | 3.85                     | 8.03               | 8.11      | 7.59        | 9.59                  | 2.04             |
| 2015                                                      | 14.8                | 16.5               | 18.3      | 16.8        | 17.5                  | 16.2             | 9.63                     | 11.49              | 14.38     | 7.69        | 9.38                  | 8.00             |
| 2016                                                      | 18.5                | 21.6               | 21.5      | 19.1        | 19.5                  | 17.5             | 25.00                    | 30.91              | 17.49     | 13.69       | 11.43                 | 8.02             |
| 2017                                                      | 20.2                | 23.7               | 24.1      | 20.5        | 21.3                  | 18.2             | 9.19                     | 9.72               | 12.09     | 7.33        | 9.23                  | 4.00             |
| 2018                                                      | 19.7                | 22.1               | 23.0      | 19.6        | 20.1                  | 17.3             | -2.48                    | -6.75              | -4.56     | -4.39       | -5.63                 | -4.95            |
| 2019                                                      | 21.8                | 21.9               | 23.8      | 20.4        | 21.0                  | 17.6             | 10.66                    | -0.90              | 3.48      | 4.08        | 4.48                  | 1.73             |
| 2020                                                      | 29.0                | 26.9               | 31.6      | 27.0        | 27.3                  | 24.4             | 33.03                    | 22.83              | 32.77     | 32.35       | 30.00                 | 38.64            |
| Average Annual Increase                                   |                     |                    |           |             |                       |                  | 6.56                     | 8.67               | 8.45      | 9.21        | 9.69                  | 9.84             |
| Change 1999 to 2020 (Percent)                             |                     |                    |           |             |                       |                  | 249.40                   | 438.00             | 418.03    | 500.00      | 550.00                | 559.46           |

Data Source: CDC WONDER, Multiple Cause of Death Files; Includes deaths with an underlying cause ICD-10 code of X40-X44, X60-X64, X85, Y10-Y14.

Rates are age adjusted.

Note: Shaded cells indicate the category with the highest fatal drug poisoning rate and highest annual rate of growth in that year.

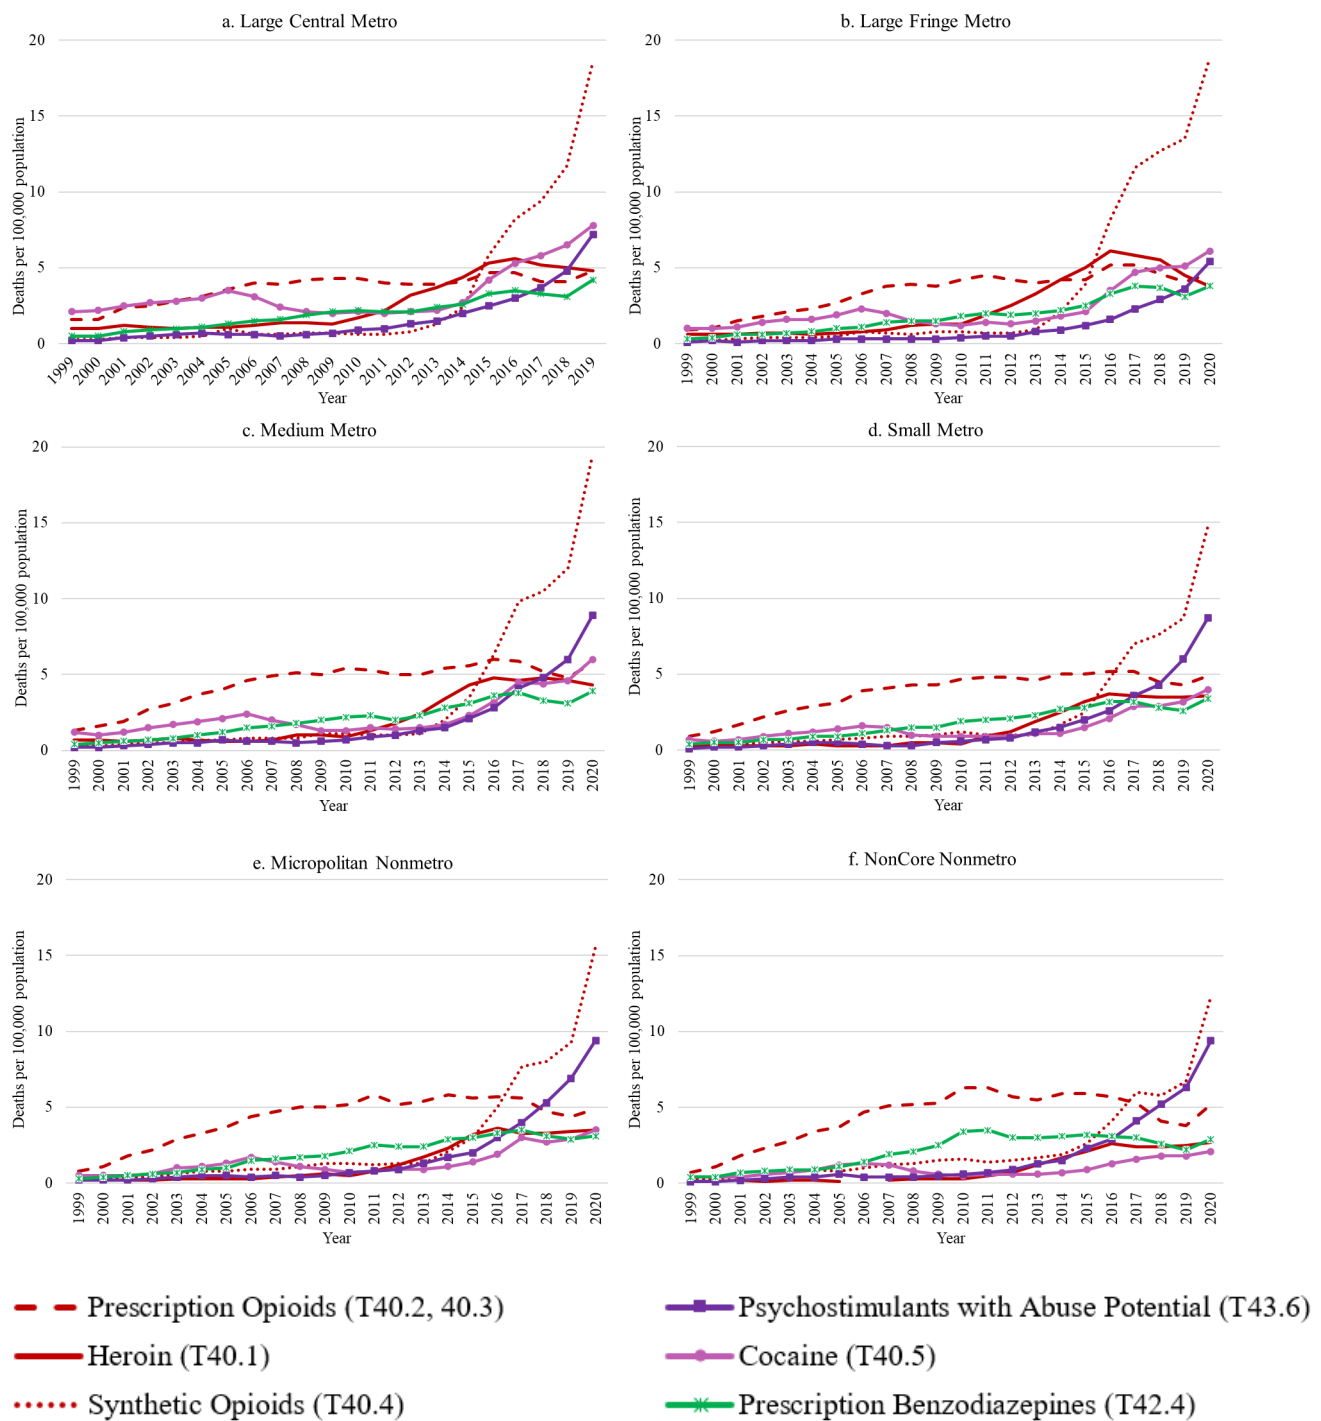

**Figure B2. Fatal Drug Poisonings by Drug Type by Metro Status, 1999-2020**

*Data Source:* CDC WONDER, Multiple Cause of Death Files

*Notes:* Includes deaths with an underlying cause ICD-10 code of X40-X44, X60-X64, X85, Y10-Y14. T-codes represent the drug involved in the overdose, based on multiple cause of death coding. Categories are not mutually exclusive because deaths may involve more than one drug.
